# Supplementary material
Source: PubMed Central journal article supplement (PMC4614740)
Supplement: rstb20140284supp1.pdf [file rstb20140284supp1.pdf]

ELECTRONIC SUPPLEMENTARY MATERIAL OF:

Piero Visconti, Michel Bakkenes, Robert J. Smith, Lucas Joppa, Rachel E. Sykes 2015. Socio-economic and ecological impacts of global protected area expansion plans. *Philosophical Transactions of the Royal Society B*. 10.1098/rstb.2014.0284

**S1 Description of the Habitat Suitability Models for mammals**

Each combination of land-cover, land-use and elevation within a grid cell was scored as either suitable or not according to the land-cover and altitudinal preferences of species and their sensitivity to different land-uses reported by IUCN taxonomic experts (1). For each species, suitable habitat within the 6' cells inside a species range was calculated as the proportion of suitable land-cover/land-use within the cell multiplied by the proportion of suitable altitude within the cell. The ESH was the sum of all suitable habitat within a species' range.

**Table S1.** Assumptions of Business-as-usual and Consumption Change scenarios for the year 2050 (2).

| <b>Assumption</b>                | <b>Business-as-usual</b>                                                              | <b>Consumption Change</b>                                                                                                                                                                    |
|----------------------------------|---------------------------------------------------------------------------------------|----------------------------------------------------------------------------------------------------------------------------------------------------------------------------------------------|
| <b>Access to food</b>            | 250 million people globally have insufficient access to food in 2050                  | Inequality in access to food due to income inequality converges to zero by 2050                                                                                                              |
| <b>Consumption</b>               | +65% energy consumption, + 50% food consumption                                       | Meat consumption per capita levels off at twice the consumption level suggested by a supposed healthy diet (3) which would imply reducing meat and egg consumption in all regions by 76-88%. |
| <b>Waste</b>                     | Stable 30% of total production                                                        | Waste is reduced by 50% respect to BAU by 2030                                                                                                                                               |
| <b>Agricultural productivity</b> | Yield increase by 0.06% annually (+27% by 2050)                                       | In all regions, 15% increase in crop yields by 2050, compared with the BAU scenario                                                                                                          |
| <b>Protected areas</b>           | No further protected areas respect to 2010                                            | 17% of each of the 65 realm-biomes protected by 2020. Expansion allocated close to existing agriculture to protect areas currently most threatened by habitat loss                           |
| <b>Forestry</b>                  | +30% in clearcut +35% plantation -12.5% selective logging. No reduced impact logging. | Forest plantations supply 50% of timber demand; almost all selective logging based on Reduced Impact Logging by 2020.                                                                        |

**Table S2.** Sustainability goals adopted in the Rio+20 study and applied to design the Consumption Change scenario.

| <b>Goals for food, land and biodiversity loss</b>                                                                                                                                                                                                                                                 | <b>Goals for energy, air pollution and climate</b>                                                                                                                                                                                                                                                                               |
|---------------------------------------------------------------------------------------------------------------------------------------------------------------------------------------------------------------------------------------------------------------------------------------------------|----------------------------------------------------------------------------------------------------------------------------------------------------------------------------------------------------------------------------------------------------------------------------------------------------------------------------------|
| <ul style="list-style-type: none"> <li>• Halve, the proportion of people who suffer from hunger by 2030, and fully eradicate hunger by 2050;</li> <li>• Halve the rate of loss of biodiversity by 2020 and maintain biodiversity at the 2020/2030 level by 2050 (depending on region).</li> </ul> | <ul style="list-style-type: none"> <li>• Achieve universal access to electricity and modern cooking fuels by 2030;</li> <li>• Avoid temperature increases above 2 °C keep atmospheric greenhouse gas concentrations below 450 ppm CO2 equivalent;</li> <li>• Keep annual PM2.5 concentrations below 35 µg/m3 by 2030.</li> </ul> |

**Table S3.** Regional area demand for different land-uses by 2020 under the Business-as-usual socio-economic scenario.

| <b>Region code</b> | <b>Region name</b>    | <b>Cropland</b> | <b>Pastures</b> | <b>Plantations</b> | <b>Clear-cut</b> | <b>Logging</b> |
|--------------------|-----------------------|-----------------|-----------------|--------------------|------------------|----------------|
| 1                  | Canada                | 609,524         | 160,342         | 0                  | 501,112          | 0              |
| 2                  | USA                   | 1,647,216       | 1,926,053       | 221,031            | 857,241          | 0              |
| 3                  | Mexico                | 267,760         | 593,352         | 3,792              | 117,288          | 96,145         |
| 4                  | Rest Central America  | 167,520         | 188,128         | 5,476              | 149,776          | 131,490        |
| 5                  | Brazil                | 741,772         | 2,035,753       | 48,990             | 1,308,755        | 817,810        |
| 6                  | Rest South America    | 752,532         | 2,170,288       | 25,195             | 697,091          | 423,144        |
| 7                  | Northern Africa       | 253,446         | 528,227         | 0                  | 0                | 0              |
| 8                  | Western Africa        | 1,570,337       | 2,507,722       | 1,923              | 362,605          | 1,778,662      |
| 9                  | Eastern Africa        | 623,715         | 1,996,176       | 2,240              | 112,465          | 147,670        |
| 10                 | Southern Africa       | 512,857         | 3,122,754       | 3,012              | 144,474          | 0              |
| 11                 | OECD Europe           | 857,155         | 507,552         | 164,788            | 680,398          | 0              |
| 12                 | Eastern Europe        | 544,454         | 194,777         | 47,663             | 486,957          | 0              |
| 13                 | Turkey                | 334,835         | 156,334         | 12,943             | 53,642           | 0              |
| 14                 | Ukraine + Belarus     | 552,425         | 152,050         | 7,148              | 54,281           | 0              |
| 15                 | Central Asia          | 306,708         | 512,789         | 1,770              | 70,025           | 0              |
| 16                 | Russia                | 1,368,070       | 960,923         | 143,309            | 1,123,420        | 0              |
| 17                 | Middle East           | 352,043         | 628,533         | 0                  | 0                | 0              |
| 18                 | South Asia            | 1,906,092       | 133,457         | 31,491             | 552,633          | 15,570         |
| 19                 | North+South Korea     | 45,683          | 2,913           | 10,311             | 85,257           | 0              |
| 20                 | China+Mongolia+Taiwan | 1,533,755       | 2,591,865       | 276,571            | 638,941          | 0              |
| 21                 | South East Asia       | 743,504         | 49,014          | 19,496             | 774,129          | 140,704        |
| 22                 | Indonesia + PNG       | 497,482         | 139,443         | 9,662              | 760,800          | 236,367        |
| 23                 | Japan                 | 38,399          | 3,720           | 57,433             | 256,798          | 0              |
| 24                 | Oceania               | 473,659         | 1,406,584       | 53,712             | 396,170          | 0              |
| 25                 | Greenland             | 0               | 0               | 0                  | 0                | 0              |

**Table S4.** Regional area demand for different land-uses by 2020 under the Consumption Change socio-economic scenario.

| <b>Region code</b> | <b>Region name</b>    | <b>Cropland</b> | <b>Pastures</b> | <b>Plantations</b> | <b>Clear-cut</b> | <b>Logging</b> |
|--------------------|-----------------------|-----------------|-----------------|--------------------|------------------|----------------|
| <b>1</b>           | Canada                | 444,509         | 126,327         | 0                  | 685,128          | 0              |
| <b>2</b>           | USA                   | 1,509,125       | 1,573,340       | 246,475            | 1,241,098        | 0              |
| <b>3</b>           | Mexico                | 258,940         | 463,326         | 3,994              | 105,267          | 61,418         |
| <b>4</b>           | Rest Central America  | 144,047         | 177,939         | 6,080              | 150,660          | 73,451         |
| <b>5</b>           | Brazil                | 722,170         | 1,526,149       | 57,932             | 1,587,846        | 396,074        |
| <b>6</b>           | Rest South America    | 645,980         | 1,602,345       | 29,526             | 967,729          | 385,631        |
| <b>7</b>           | Northern Africa       | 277,953         | 496,296         | 0                  | 0                | 0              |
| <b>8</b>           | Western Africa        | 1,538,671       | 2,468,004       | 2,405              | 347,268          | 917,136        |
| <b>9</b>           | Eastern Africa        | 666,793         | 1,954,646       | 2,673              | 114,865          | 85,317         |
| <b>10</b>          | Southern Africa       | 515,862         | 2,733,406       | 3,012              | 201,662          | 0              |
| <b>11</b>          | OECD Europe           | 831,614         | 504,659         | 178,774            | 697,080          | 0              |
| <b>12</b>          | Eastern Europe        | 522,195         | 185,079         | 47,905             | 512,439          | 0              |
| <b>13</b>          | Turkey                | 271,859         | 131,279         | 12,925             | 57,879           | 0              |
| <b>14</b>          | Ukraine + Belarus     | 485,878         | 142,412         | 7,611              | 78,918           | 0              |
| <b>15</b>          | Central Asia          | 298,078         | 473,949         | 1,792              | 71,399           | 0              |
| <b>16</b>          | Russia                | 1,268,960       | 799,840         | 146,067            | 1,312,802        | 0              |
| <b>17</b>          | Middle East           | 352,205         | 612,132         | 0                  | 0                | 0              |
| <b>18</b>          | South Asia            | 1,981,069       | 134,025         | 51,178             | 530,047          | 5,056          |
| <b>19</b>          | North+South Korea     | 44,074          | 3,325           | 14,112             | 75,189           | 0              |
| <b>20</b>          | China+Mongolia+Taiwan | 1,482,546       | 2,567,081       | 275,541            | 670,093          | 0              |
| <b>21</b>          | South East Asia       | 586,056         | 48,254          | 24,250             | 777,985          | 80,837         |
| <b>22</b>          | Indonesia + PNG       | 383,608         | 130,684         | 12,897             | 762,439          | 147,251        |
| <b>23</b>          | Japan                 | 37,968          | 3,451           | 60,192             | 246,151          | 0              |
| <b>24</b>          | Oceania               | 570,642         | 1,302,283       | 53,417             | 280,045          | 0              |
| <b>25</b>          | Greenland             | 0               | 0               | 0                  | 0                | 0              |





**Table S7.** Spatial datasets used in the analyses.

| <b>Dataset &amp; source*</b>                                                                                   | <b>Details</b>                                                                                                                                                                                                                                                                                                                                                                                                                                                                                                                                                                                                                                                                                                                                                                                                                                                      |
|----------------------------------------------------------------------------------------------------------------|---------------------------------------------------------------------------------------------------------------------------------------------------------------------------------------------------------------------------------------------------------------------------------------------------------------------------------------------------------------------------------------------------------------------------------------------------------------------------------------------------------------------------------------------------------------------------------------------------------------------------------------------------------------------------------------------------------------------------------------------------------------------------------------------------------------------------------------------------------------------|
| Protected Areas: January 2013 version of the World Database on Protected Areas (WDPA; IUCN and UNEP-WCMC 2013) | <ul style="list-style-type: none"> <li>• Added 2,437 PAs (12,178 km<sup>2</sup>) from Estonia (sensitive sites that are not publicly available in the WDPA).</li> <li>• Included internationally designated sites, except UNESCO Biosphere Reserves (because they may include large areas that are not considered PAs: Coetzer <i>et al.</i> 2013).</li> <li>• Excluded 2,663 proposed sites, 3,330 sites with unknown designation status, and 7,276 sites lacking both spatial boundaries and reported extent.</li> <li>• Represented 21,697 sites with a point locality and reported extent using geodetic buffers of the appropriate area.</li> <li>• Spatially ‘dissolved’ overlapping areas into a single polygon, applying the earliest year of designation of any of the overlapping sites.</li> </ul>                                                       |
| <b>Species:</b> non-birds from IUCN (2012), birds from BirdLife International and NatureServe (2012)           | <ul style="list-style-type: none"> <li>• Number of mapped extant threatened species = 1,112 mammals, 1,181 birds (115 of which are migratory and had conservation targets set for both breeding and non-breeding ranges), 1,924 amphibians</li> <li>• Included polygons with origin coded as native or reintroduced, and presence coded as extant, probably extant or possibly extinct.</li> <li>• IUCN range maps show the distribution extent of each species, and are based on a variety of sources, including localities of specimens and observations, known occurrences in PAs (and, for birds, Important Bird Areas), detailed distribution atlases (including those with presence-absence and/or abundance data), field-guides, family monographs, habitat extent and expert knowledge, all derived from both published and unpublished sources.</li> </ul> |
| <b>Ecoregions:</b> terrestrial ecoregions from Olson <i>et al.</i> (2001)                                      |                                                                                                                                                                                                                                                                                                                                                                                                                                                                                                                                                                                                                                                                                                                                                                                                                                                                     |

BirdLife International & NatureServe (2012). *Bird species distribution maps of the world. Version 2.0*. BirdLife International, Cambridge, UK and NatureServe, Arlington, USA.

Coetzer, K.L., Witkowski, E.T.F. & Erasmus, B.F.N. (2013). Reviewing Biosphere Reserves globally: effective conservation action or bureaucratic label? *Biol. Rev.*, 89, 82–104.

IUCN (2012), IUCN (2012). *IUCN Red List of Threatened Species. Version 2012.1*. Available at: <http://www.iucnredlist.org>. Accessed 1 October 2013.

IUCN & UNEP-WCMC (2013). The World Database on Protected Areas. Available at <http://www.protectedplanet.net>. Accessed 1 Oct 2013.

Olson, D.M., Dinerstein, E.D., Wikramanayake, E. *et al.* (2001). Terrestrial ecoregions of the world: A new map of life on Earth. *BioScience*, 51, 933–938.

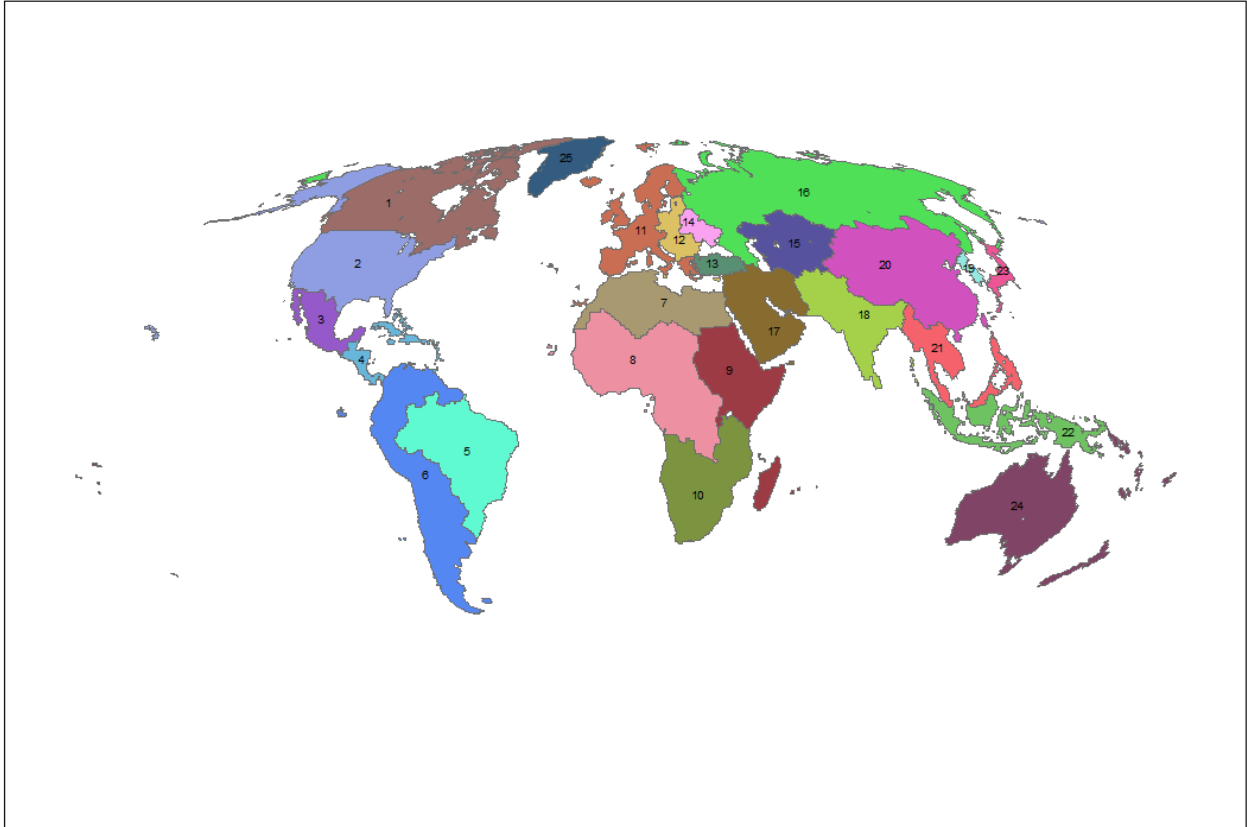

**Figure S1.** Map of the 25 Macro-Regions used by the IMAGE Integrated Assessment Model to simulate macro-economic scenarios. 1 Canada, 2 USA, 3 Mexico, 4 Rest of Central America, 5 Brazil, 6 Rest of South America, 7 Northern Africa, 8 Western Africa, 9 Eastern Africa, 10 Southern Africa, 11 OECD Europe, 12 Eastern Europe, 13 Turkey, 14 Ukraine + Belarus, 15 Central Asia, 16 Russia, 17 Middle East, 18 South Asia , 19 North + South Korea, 20 China + Mongolia + Taiwan, 21 South East Asia, 22 Indonesia + Papua New Guinea, 23 Japan, 24 Oceania, 25 Greenland.

1. Rondinini C, Di Marco M, Chiozza F, Santulli G, Baisero D, Visconti P, et al. Global habitat suitability models of terrestrial mammals. *Philosophical Transactions of the Royal Society B: Biological Sciences*. 2011;366(1578):2633-41.
2. PBL. *Roads from Rio+20 Pathways to achieve global sustainability goals by 2050*. The Hague, The Netherlands 2012. 283 p.
3. Stehfest E, Bouwman L, van Vuuren DP, den Elzen MG, Eickhout B, Kabat P. Climate benefits of changing diet. *Climatic Change*. 2009;95(1-2):83-102.
